# Supplementary material for: (−)-Epicatechin and colonic metabolite 2,3-dihydroxybenzoic acid, alone or in combination with metformin, protect cardiomyocytes from high glucose/high palmitic acid-induced damage by regulating redox status, apoptosis and autophagy
Source: Royal Society of Chemistry journal article supplement (doi:10.1039/d3fo04039a), 2024-01-01

## UNCROPPED WESTERN BLOTS

Figure 1

### p-ERK

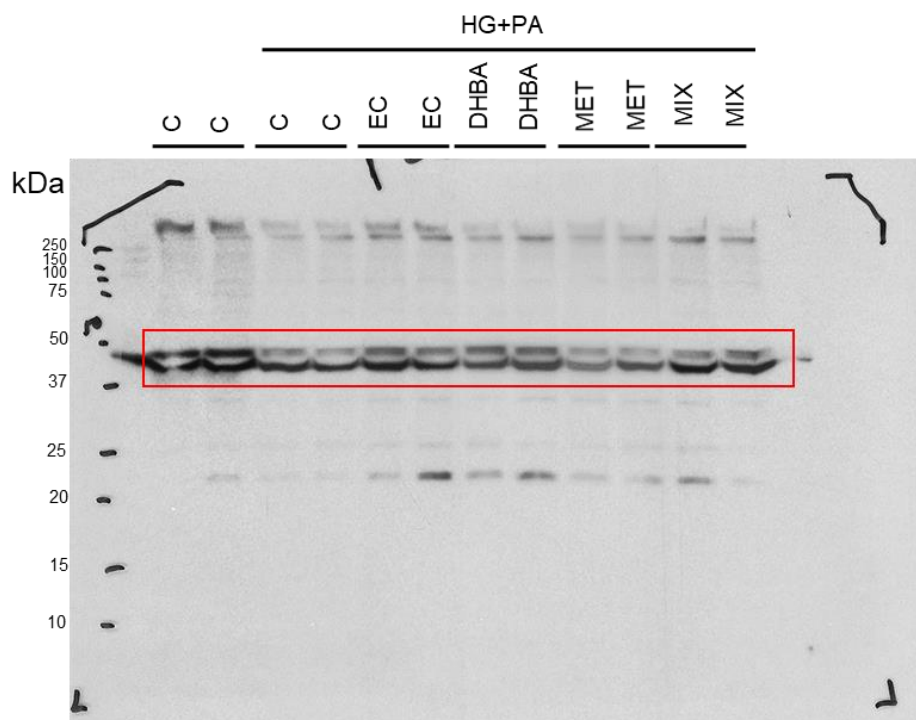

### ERK

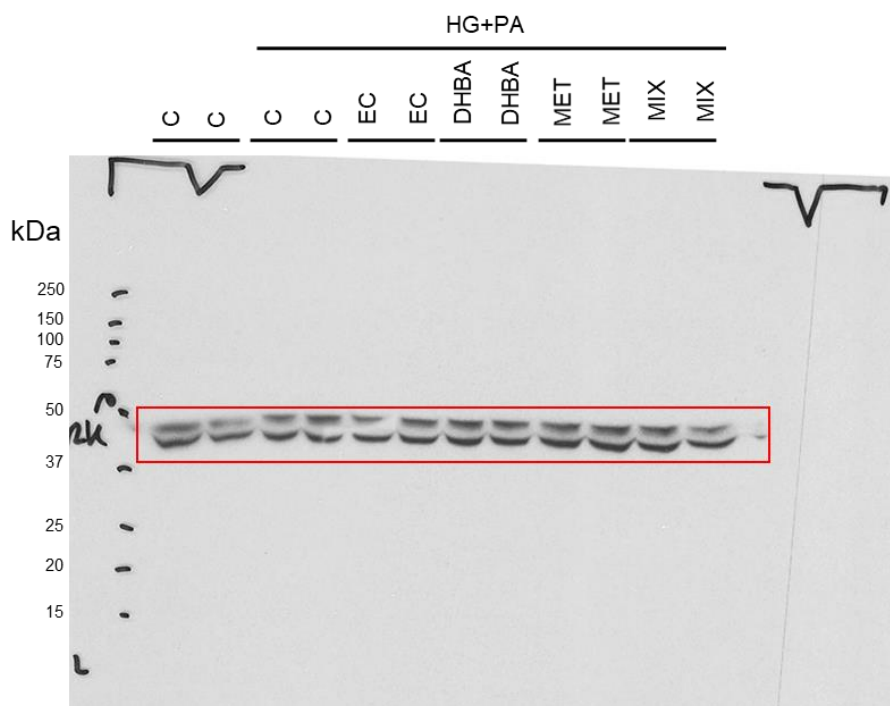

# p-JNK

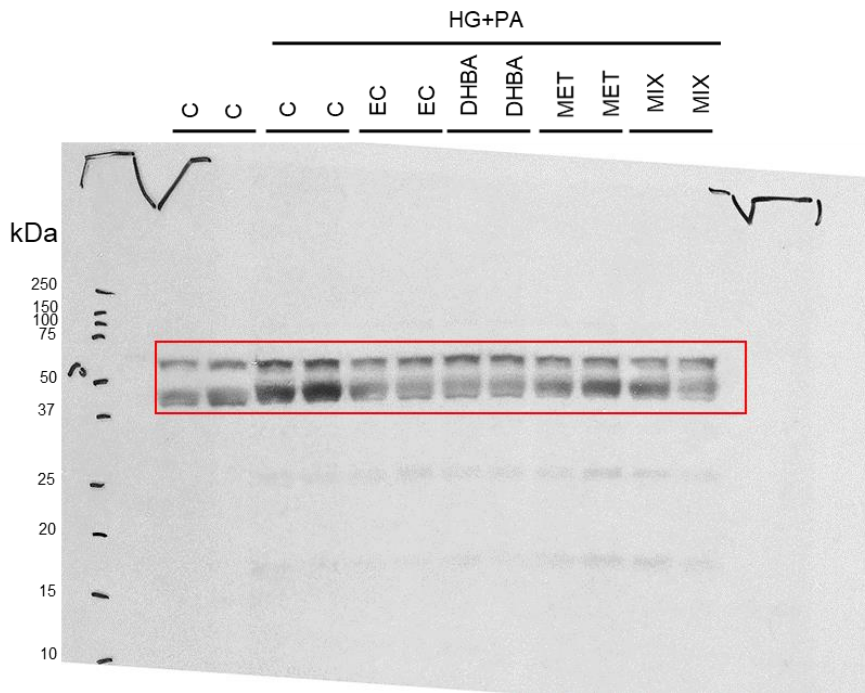

# JNK

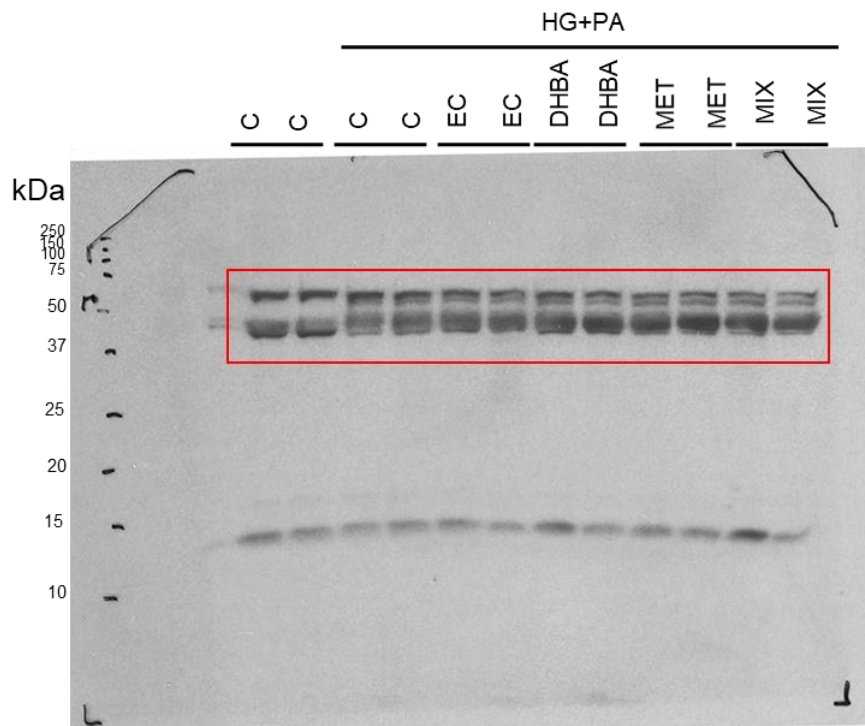

# $\beta$ -actin

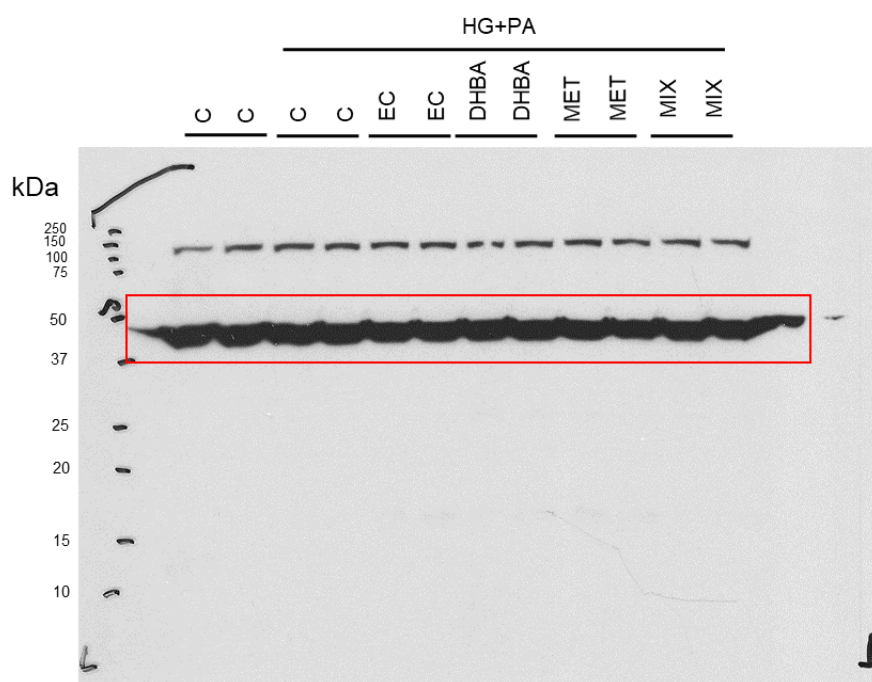

**Figure 2**

**Bcl-2**

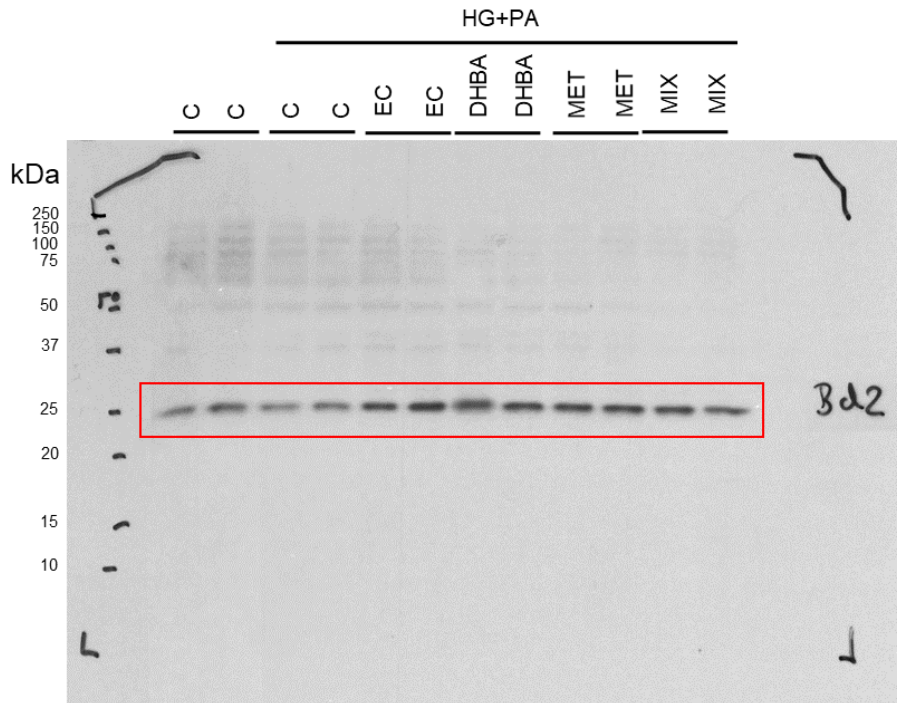

**Bax**

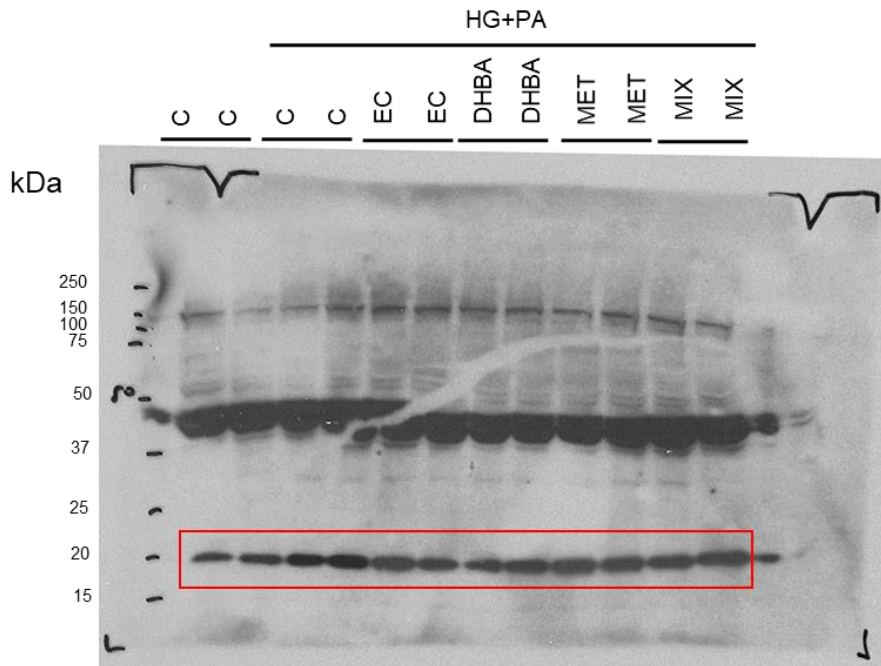

### Cleaved caspase-3

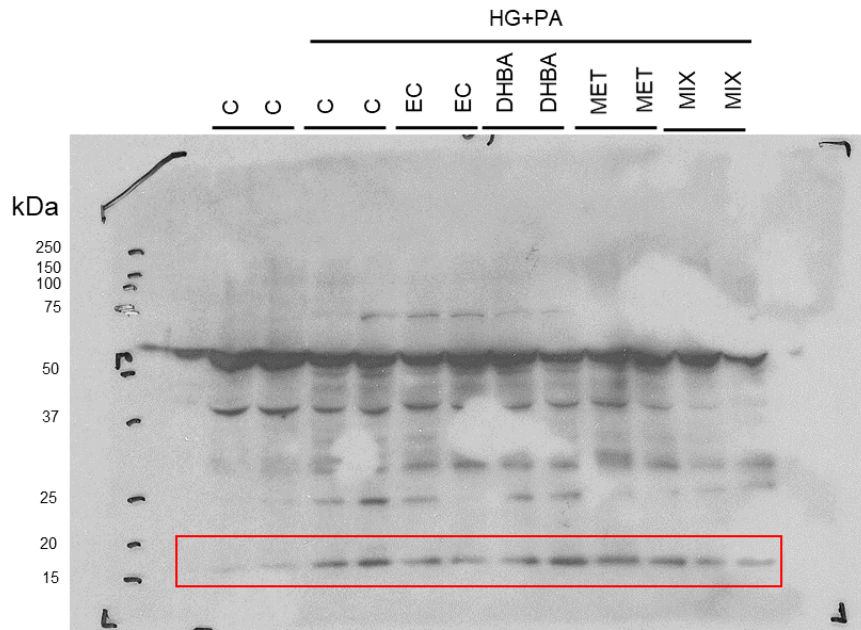

### $\beta$ -actin

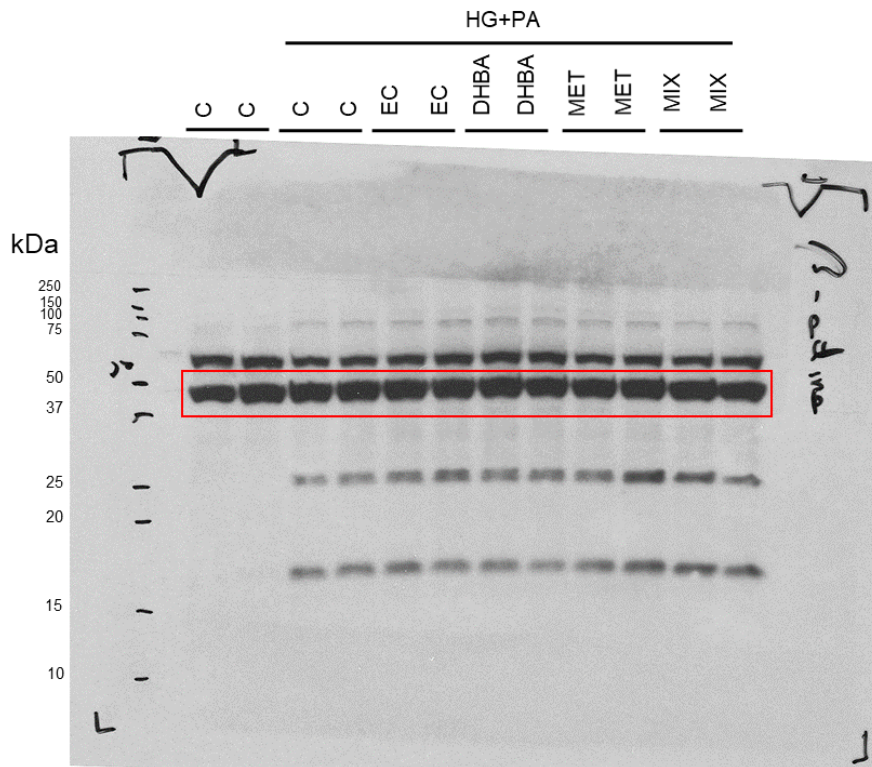

**Figure 3**

**p62**

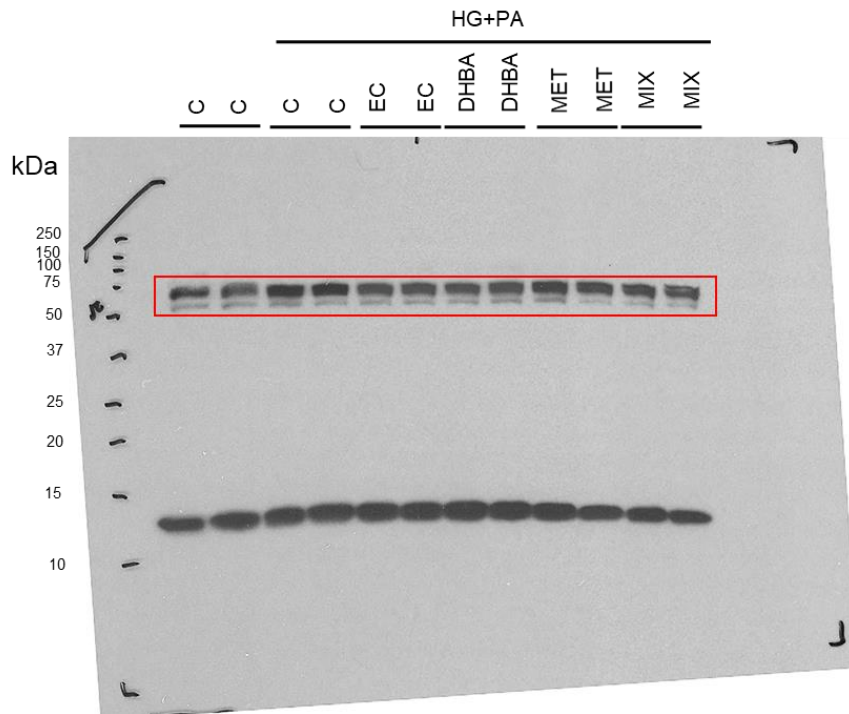

**Beclin-1**

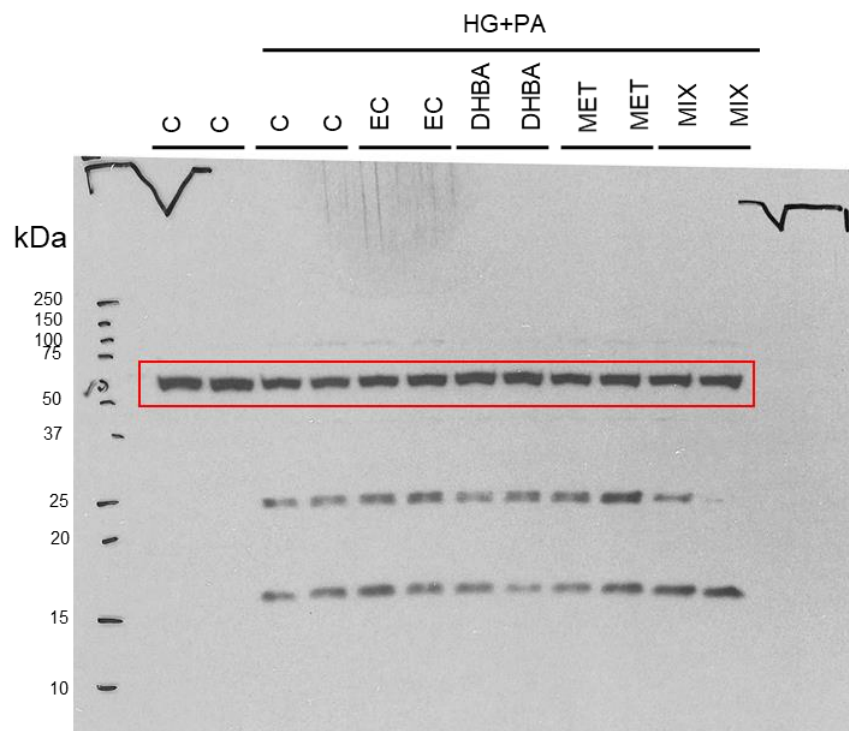

## LC3-I & LC3-II

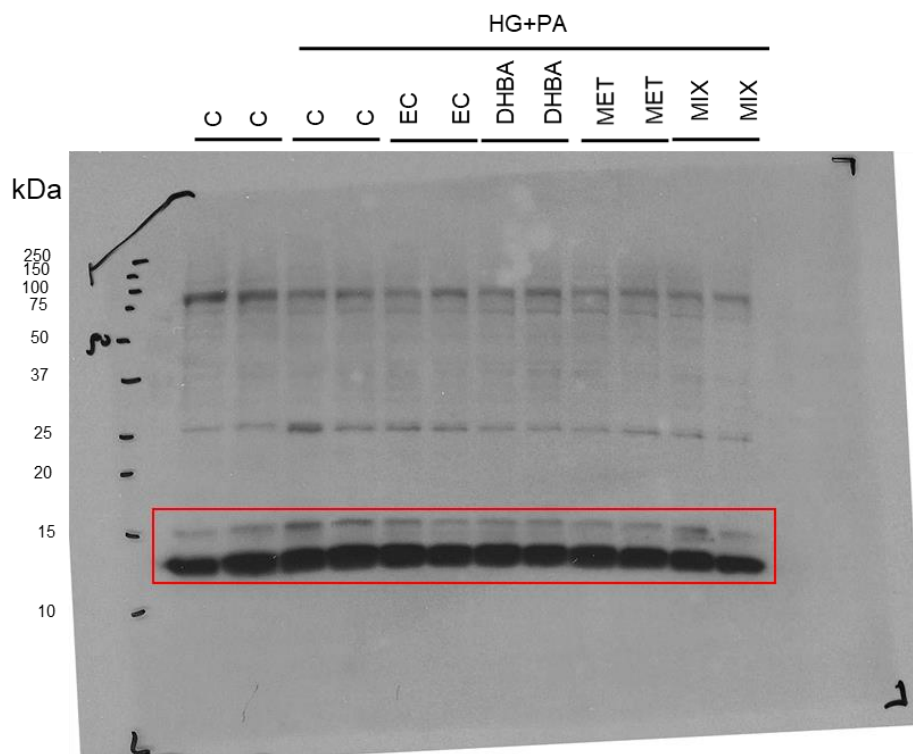

## $\beta$ -actin

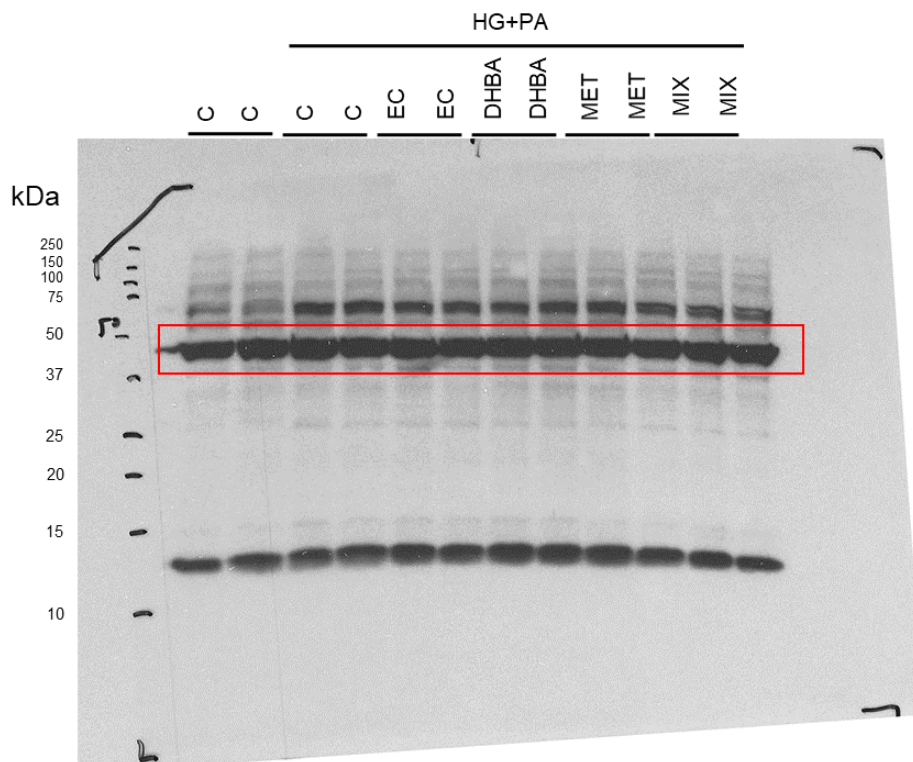

## Figure 5A

Please, note that EC and DHBA experimental conditions were loaded on the same gel and thus, C (control, untreated cells) and HG+PA bands were the same for both compounds. In the figure, the cropping has been marked in the corresponding bands (those that shared the controls) with a dashed line.

### Bcl-2

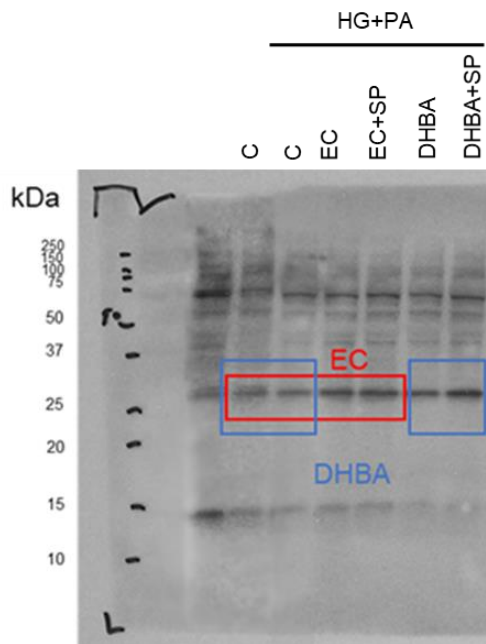



## Bax

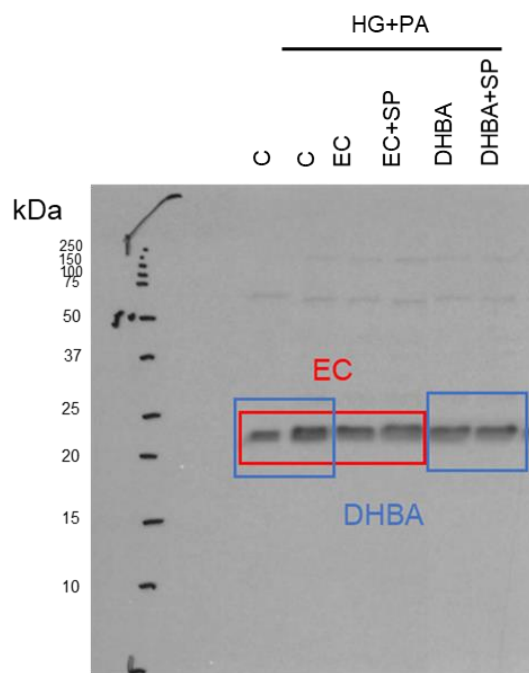

## Cleaved caspase-3

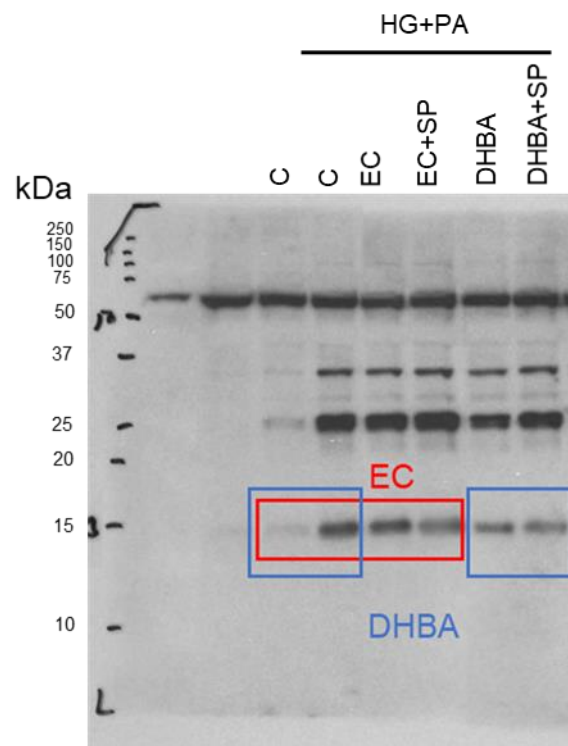

## $\beta$ -actin

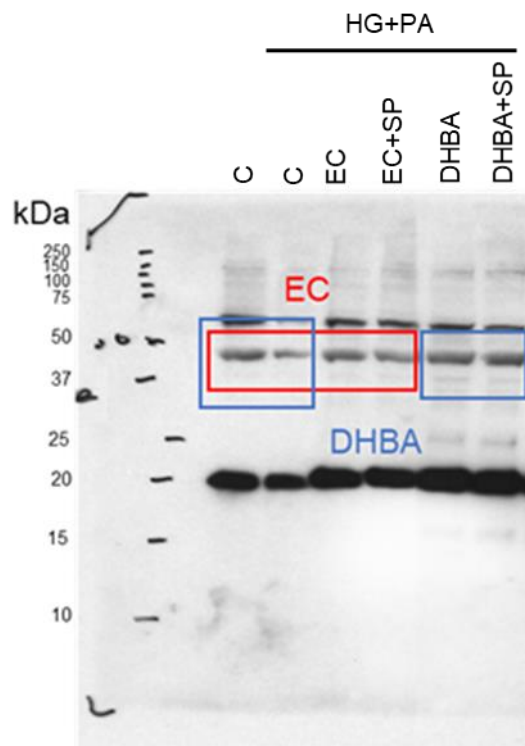

## Bcl-2

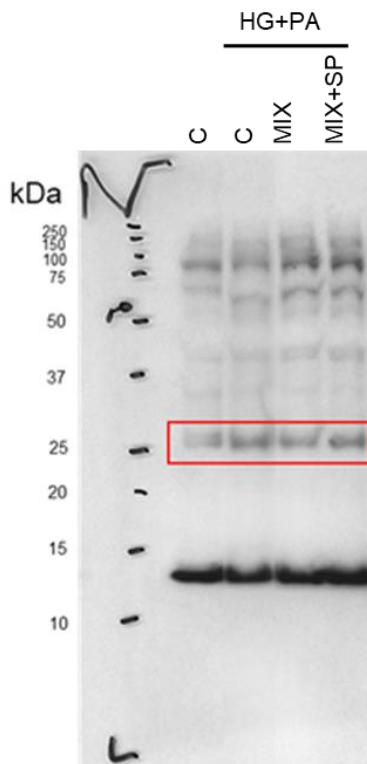

## Bax

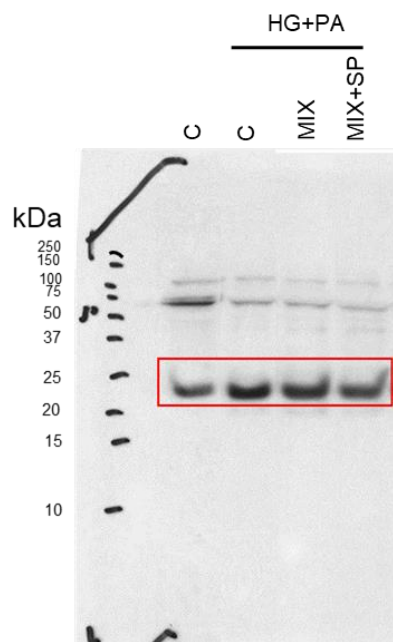

## Cleaved caspase-3

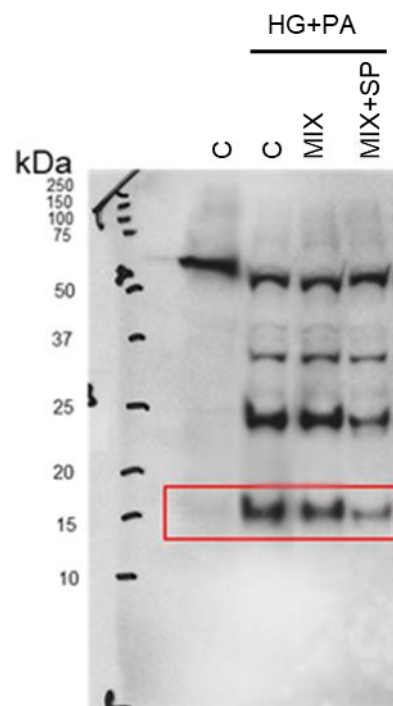

**$\beta$ -actin**

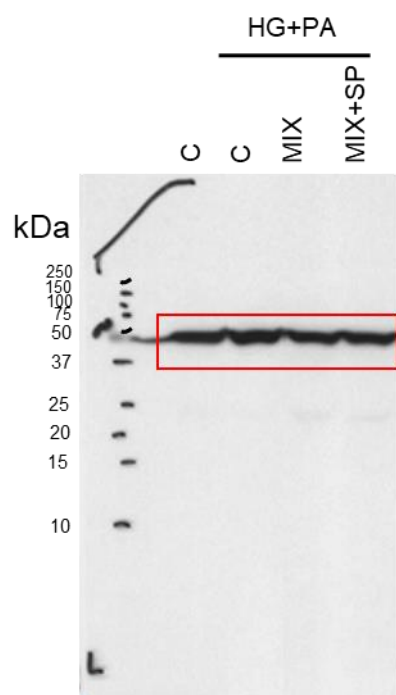

## Figure 6A

Please, note that EC and DHBA experimental conditions were loaded on the same gel and thus, C (control, untreated cells) and HG+PA bands were the same for both compounds. In the figure, the cropping has been marked in the corresponding bands (those that shared the controls) with a dashed line.

p62

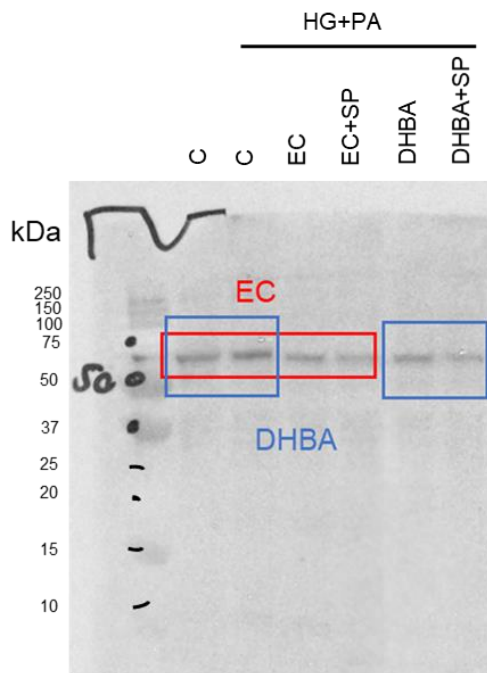

## Beclin-1

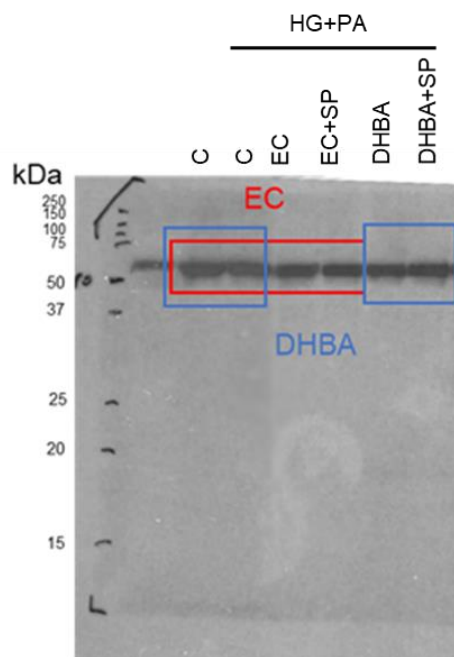

## LC3-I & LC3-II

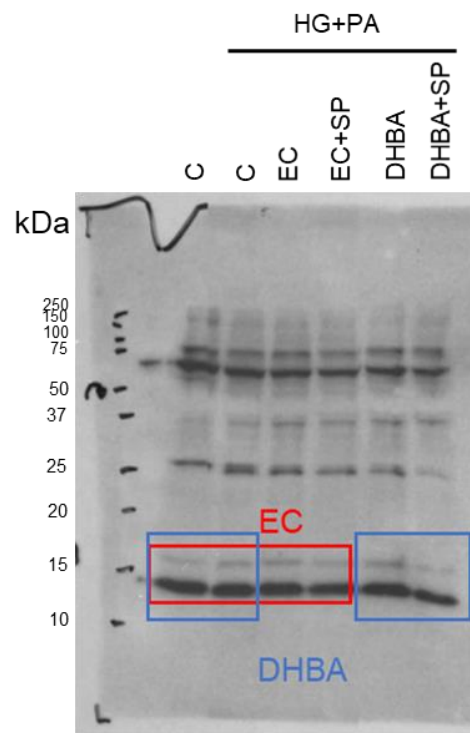

## $\beta$ -actin

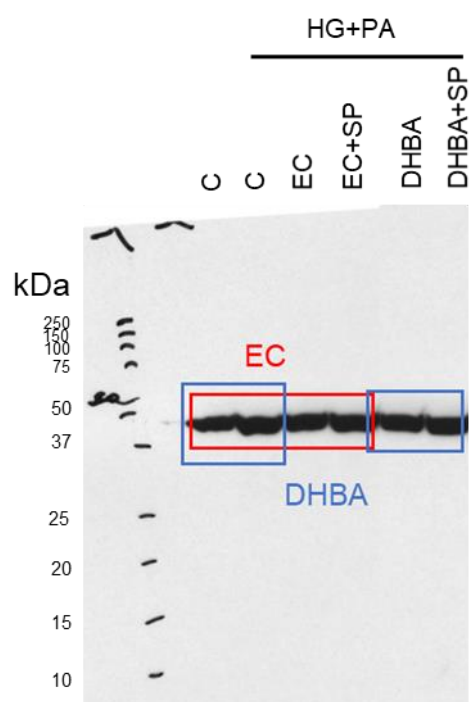

## p62

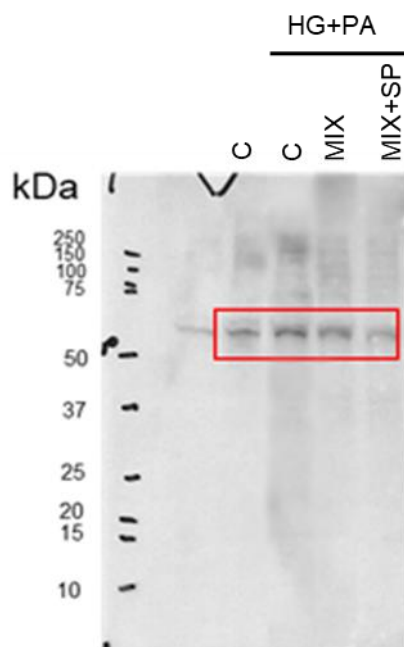

## Beclin-1

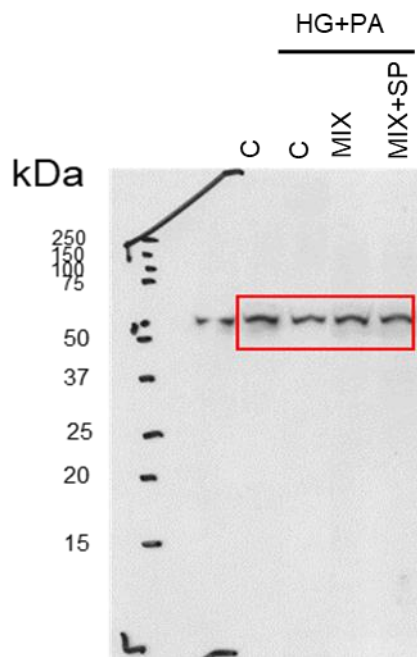

## LC3-I & LC3-II

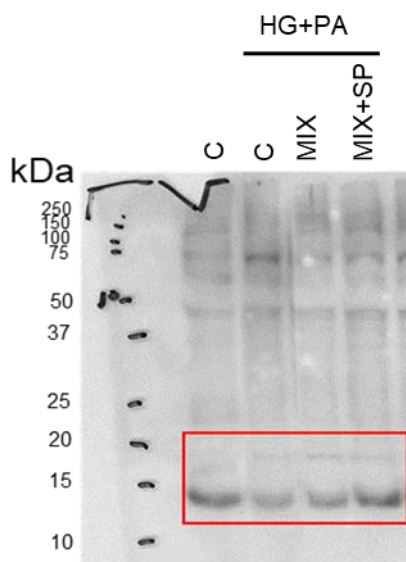



**$\beta$ -actin**

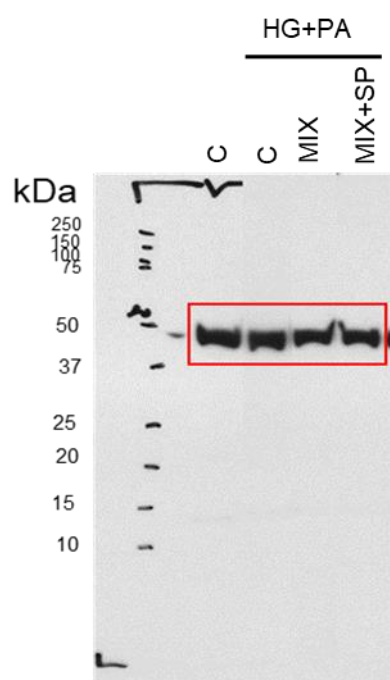

Supplement: d3fo04039a2.pdf [file d3fo04039a2.pdf]
