# Supplementary material for: (−)-Epicatechin and colonic metabolite 2,3-dihydroxybenzoic acid, alone or in combination with metformin, protect cardiomyocytes from high glucose/high palmitic acid-induced damage by regulating redox status, apoptosis and autophagy
Source: Royal Society of Chemistry journal article supplement (doi:10.1039/d3fo04039a), 2024-01-01
Supplement: d3fo04039a1.pdf [file d3fo04039a1.pdf]

**Supplementary Table 1.** Protective effect of (-)-epicatechin (EC), 2,3-dihydroxybenzoic acid (DHBA), metformin (MET) and combination of EC, DHBA and MET (MIX) reactive oxygen species (ROS) generation, and glutathione peroxidase (GPx) and superoxide dismutase (SOD) activities in cardiac cells. H9c2 cells were pre-treated with medium or supplemented medium with EC (1  $\mu$ M), DHBA (1  $\mu$ M), MET (1  $\mu$ M) or a mixture of the three compounds at the same concentration (MIX, 3  $\mu$ M) during 2 hours, and then 30 mM glucose (HG) and 200  $\mu$ M palmitic acid (PA) were added for 22 hours to all cultures except controls (incubated with medium). Results are expressed as a percent relative to the control condition. Values are means  $\pm$  SD of 6-10 data. At least three independent experiments were performed. Means in a column without a common superscript letter differ significantly at  $P < 0.05$ .

|                   | <b>ROS</b><br>(Fluorescence units) | <b>GPx</b><br>(mU/mg protein) | <b>SOD</b><br>(% of control) |
|-------------------|------------------------------------|-------------------------------|------------------------------|
| <b>Control</b>    | 1532.8 $\pm$ 88.4 <sup>a</sup>     | 129.9 $\pm$ 4.6 <sup>a</sup>  | 40.1 $\pm$ 2.5 <sup>a</sup>  |
| <b>HG+PA</b>      | 2190.8 $\pm$ 100.8 <sup>b</sup>    | 169.7 $\pm$ 6.4 <sup>b</sup>  | 33.2 $\pm$ 0.6 <sup>b</sup>  |
| <b>EC+HG+PA</b>   | 1838.4 $\pm$ 159.5 <sup>c</sup>    | 140.0 $\pm$ 6.7 <sup>ab</sup> | 36.9 $\pm$ 2.6 <sup>a</sup>  |
| <b>DHBA+HG+PA</b> | 1945.6 $\pm$ 93.5 <sup>cd</sup>    | 127.6 $\pm$ 7.7 <sup>a</sup>  | 41.4 $\pm$ 1.7 <sup>a</sup>  |
| <b>MET+HG+PA</b>  | 1945.6 $\pm$ 155.8 <sup>cd</sup>   | 138.1 $\pm$ 6.5 <sup>a</sup>  | 40.5 $\pm$ 3.2 <sup>a</sup>  |
| <b>MIX+HG+PA</b>  | 2006.9 $\pm$ 141.1 <sup>d</sup>    | 126.2 $\pm$ 4.1 <sup>a</sup>  | 37.5 $\pm$ 3.1 <sup>a</sup>  |
